# Supplementary material
Source: publisher figshare collection journal article supplement (https://tandf.figshare.com/ndownloader/files/20710074)
Supplement: Supplementary file 1 [file 20710074]

**Supplementary files:**

**Supplementary Table S1: Items summary statistics**

|                                        |                                                   | <b>N<br/>(473)</b> | <b>Missing<br/>(%)</b> | <b>Mean</b> | <b>Std.<br/>Dev.</b> | <b>%<br/>response<br/>at<br/>floor<br/>(L1)</b> | <b>%<br/>response<br/>at<br/>ceiling<br/>(L9)</b> | <b>Loadings</b> |
|----------------------------------------|---------------------------------------------------|--------------------|------------------------|-------------|----------------------|-------------------------------------------------|---------------------------------------------------|-----------------|
| <b>social wellbeing and acceptance</b> | get along with other children outside of school   | 471                | 0.42                   | 7.34        | 1.37                 | 0.21                                            | 21.87                                             | 0.724           |
|                                        | get along with adults                             | 471                | 0.42                   | 7.62        | 1.26                 | 0.21                                            | 26.96                                             | 0.796           |
|                                        | accepted by other children outside of school      | 470                | 0.64                   | 7.16        | 1.47                 | 0.43                                            | 19.15                                             | 0.674           |
|                                        | accepted by adults                                | 472                | 0.21                   | 7.61        | 1.34                 | 0.21                                            | 31.57                                             | 0.774           |
|                                        | accepted by people in general                     | 468                | 1.07                   | 7.44        | 1.32                 | 0.21                                            | 24.36                                             | 0.707           |
| <b>physical health</b>                 | ability to participate at school                  | 466                | 1.50                   | 6.95        | 1.53                 | 0.86                                            | 16.31                                             | 0.481           |
|                                        | ability to participate in recreational activities | 472                | 0.21                   | 6.70        | 1.72                 | 0.64                                            | 15.89                                             | 0.510           |
|                                        | participate in sporting activities                | 470                | 0.64                   | 6.33        | 1.83                 | 0.64                                            | 12.55                                             | 0.500           |
|                                        | their physical health                             | 472                | 0.21                   | 6.99        | 1.66                 | 0.21                                            | 19.92                                             | 0.463           |
|                                        | the way they get around                           | 473                | 0.00                   | 6.81        | 1.67                 | 0.21                                            | 16.49                                             | 0.573           |
|                                        | the way they look                                 | 473                | 0.00                   | 7.22        | 1.58                 | 0.42                                            | 25.58                                             | 0.585           |

|                            |                                                                 |     |      |      |      |      |       |       |
|----------------------------|-----------------------------------------------------------------|-----|------|------|------|------|-------|-------|
|                            | their ability to keep up physically with their peers            | 472 | 0.21 | 5.64 | 1.91 | 2.75 | 6.78  | 0.777 |
|                            | feels about themselves                                          | 471 | 0.42 | 7.32 | 1.48 | 0.42 | 25.27 | 0.558 |
|                            | the way they use their legs                                     | 471 | 0.42 | 6.08 | 1.80 | 1.27 | 10.19 | 0.697 |
| <b>communication</b>       | their ability to participate in social events outside of school | 470 | 0.64 | 7.01 | 1.58 | 0.43 | 19.79 | 0.727 |
|                            | their ability to participate in your community                  | 469 | 0.85 | 6.94 | 1.52 | 0.21 | 16.84 | 0.746 |
|                            | the way they communicate with people they know well             | 472 | 0.21 | 7.81 | 1.26 | 0.21 | 38.56 | 0.484 |
|                            | the way they communicate with people they don't know well       | 473 | 0.00 | 6.76 | 1.65 | 0.42 | 15.64 | 0.769 |
|                            | the way people communicate with them                            | 472 | 0.21 | 7.21 | 1.38 | 0.42 | 20.76 | 0.713 |
| <b>Pain and discomfort</b> | How much pain do your child have                                | 470 | 0.64 | 2.53 | 1.82 | 0.64 | 39.15 | 0.925 |
|                            | the amount of pain they have                                    | 449 | 5.35 | 2.71 | 2.09 | 1.78 | 39.87 | 0.904 |
|                            | How much discomfort does your child experience                  | 469 | 0.85 | 2.91 | 1.83 | 0.43 | 25.37 | 0.836 |

**Supplementary file 2:**

-Levels in the original instrument:

|                 |         |                                 |       |               |
|-----------------|---------|---------------------------------|-------|---------------|
| Very<br>unhappy | unhappy | Neither<br>Happy nor<br>unhappy | happy | Very<br>happy |
|-----------------|---------|---------------------------------|-------|---------------|

|   |   |   |   |   |   |   |   |   |
|---|---|---|---|---|---|---|---|---|
| 1 | 2 | 3 | 4 | 5 | 6 | 7 | 8 | 9 |
|---|---|---|---|---|---|---|---|---|

-How questions present items:

**Question:** How do you think your child feels about *how they are accepted by people in general*?

**Item:** *accepted by people in general*
